# Supplementary material
Source: PubMed Central journal article supplement (PMC4429733)

Fig 1

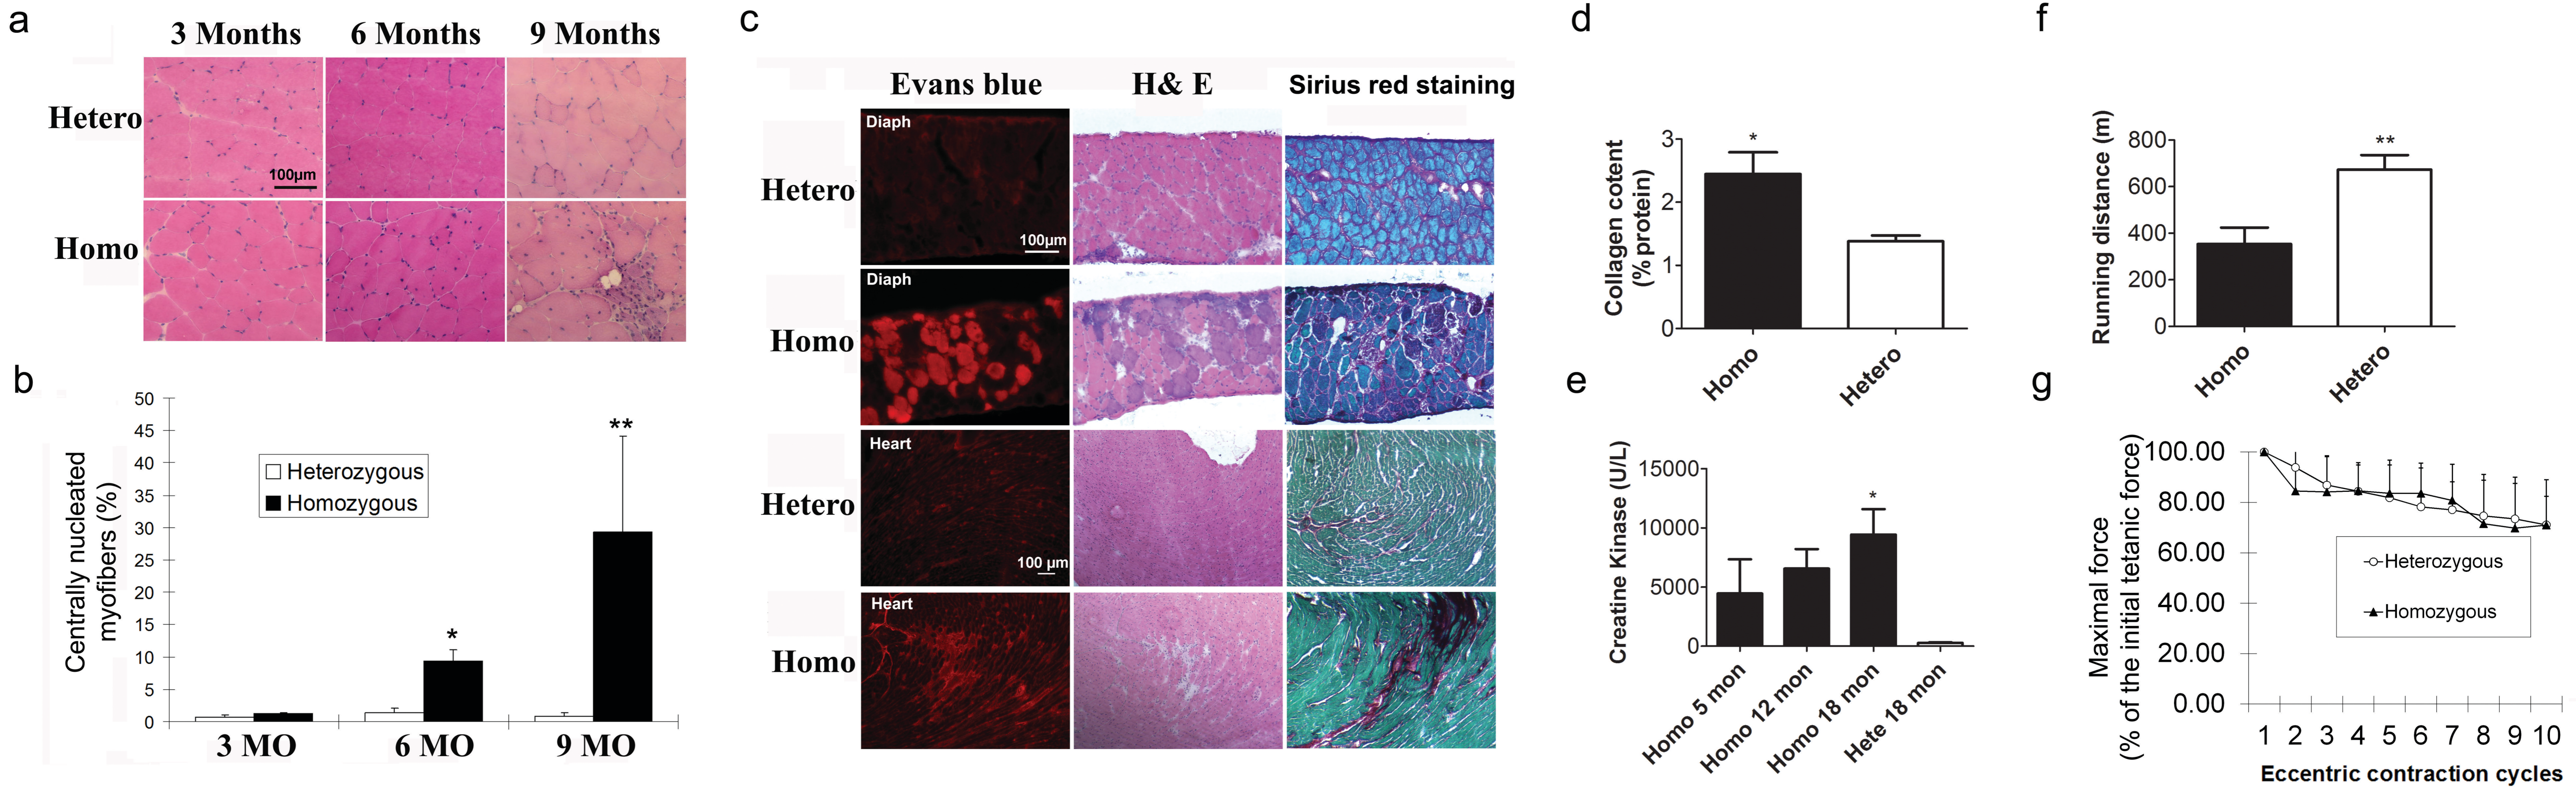

Supplement: mt2014141x1.pdf [file mt2014141x1.pdf]

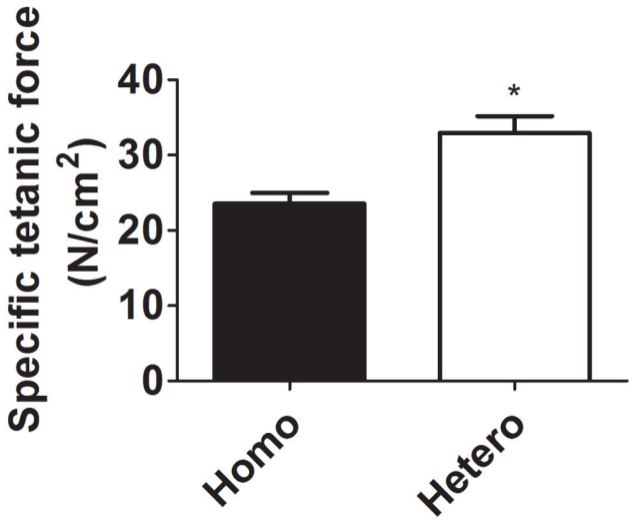

Supplement: mt2014141x2.pdf [file mt2014141x2.pdf]

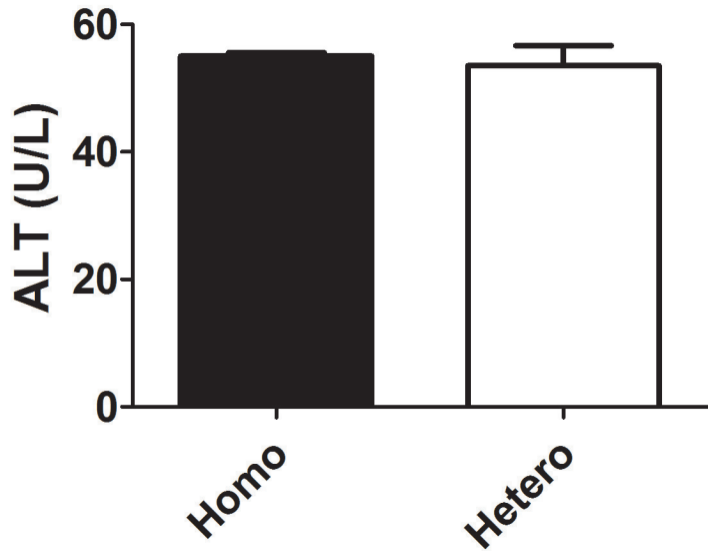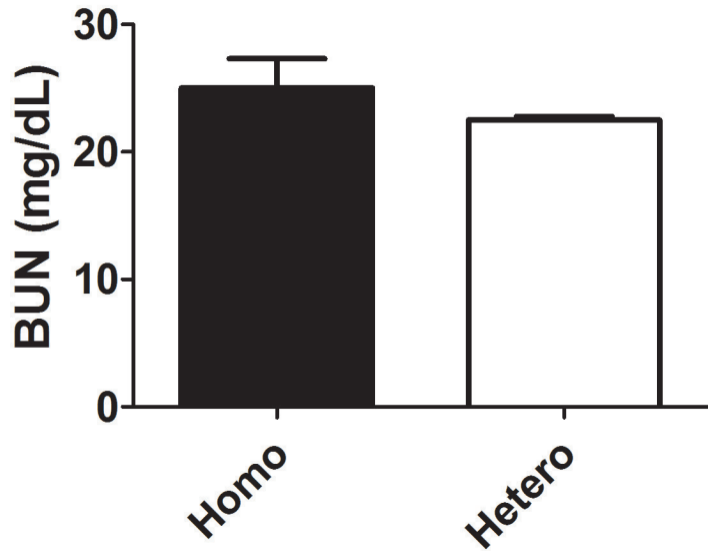

Supplement: mt2014141x3.pdf [file mt2014141x3.pdf]

anti-Myc

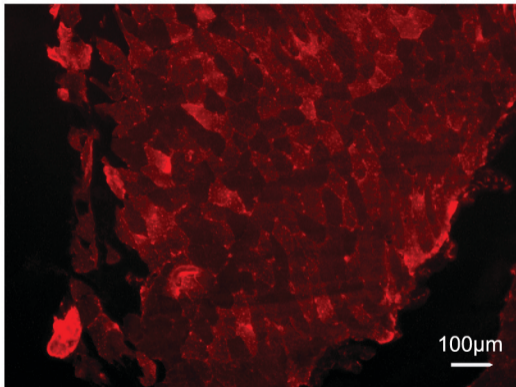

CB-FKRP homo

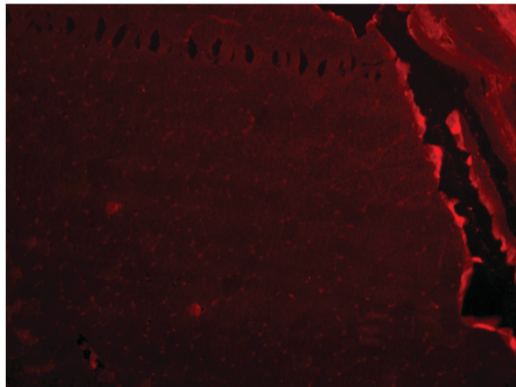

Homo

Supplement: mt2014141x4.pdf [file mt2014141x4.pdf]
